# Supplementary material for: Dose-Response Relationship between Serum Retinol Levels and Survival in Patients with Colorectal Cancer: Results from the DACHS Study
Source: PubMed Central journal article supplement (PMC5946295; doi:10.3390/nu10040510), 2018-04-19
Supplement: nutrients-10-00510-s001.pdf [file nutrients-10-00510-s001.pdf]

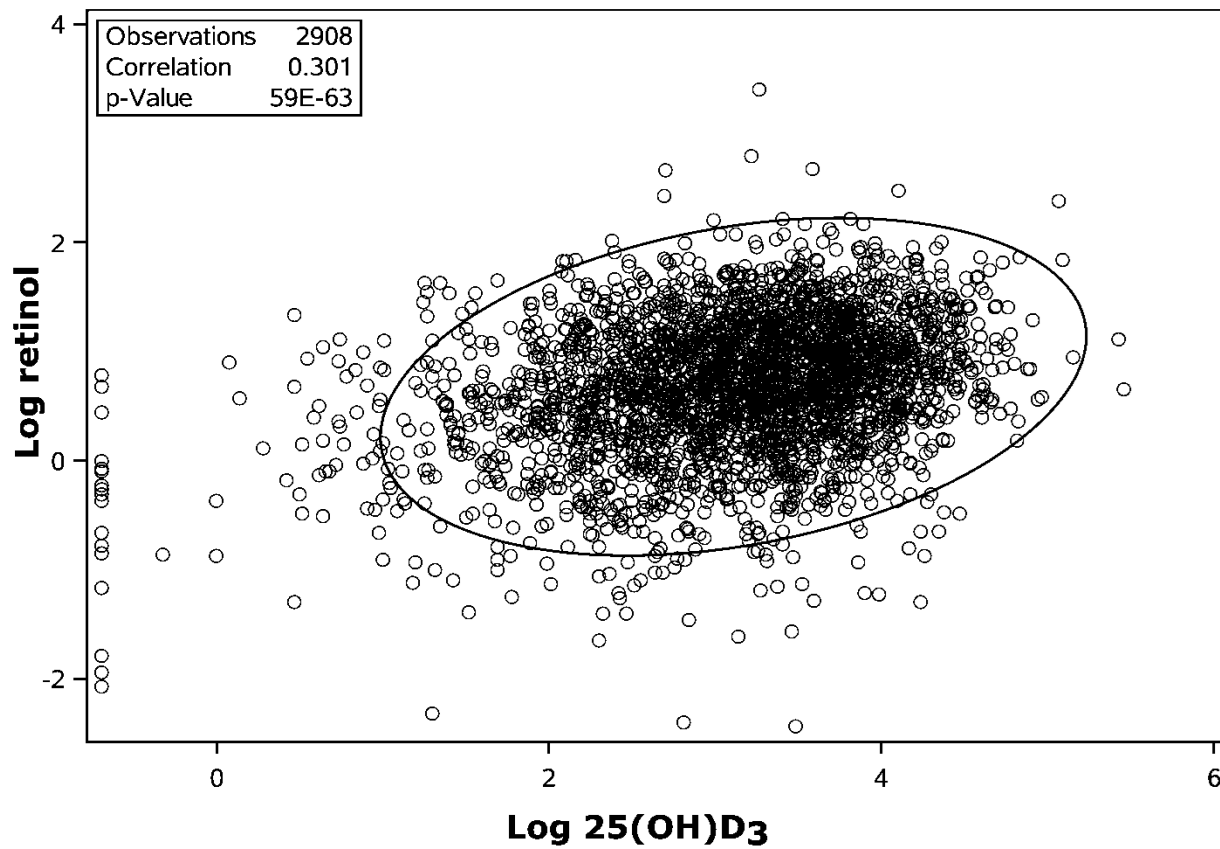

**Supplementary Figure 1:** Scatterplot with 95% confidence ellipse for log 25(OH)D<sub>3</sub> vs log retinol
